# Supplementary material for: 2A-DUB/Mysm1 Regulates Epidermal Development in Part by Suppressing p53-Mediated Programs
Source: Int J Mol Sci. 2018 Feb 28;19(3):687. doi: 10.3390/ijms19030687 (PMC5877548; doi:10.3390/ijms19030687)
Supplement: Supplementary file 1 [file ijms-19-00687-s001.pdf]

**Figure S1.**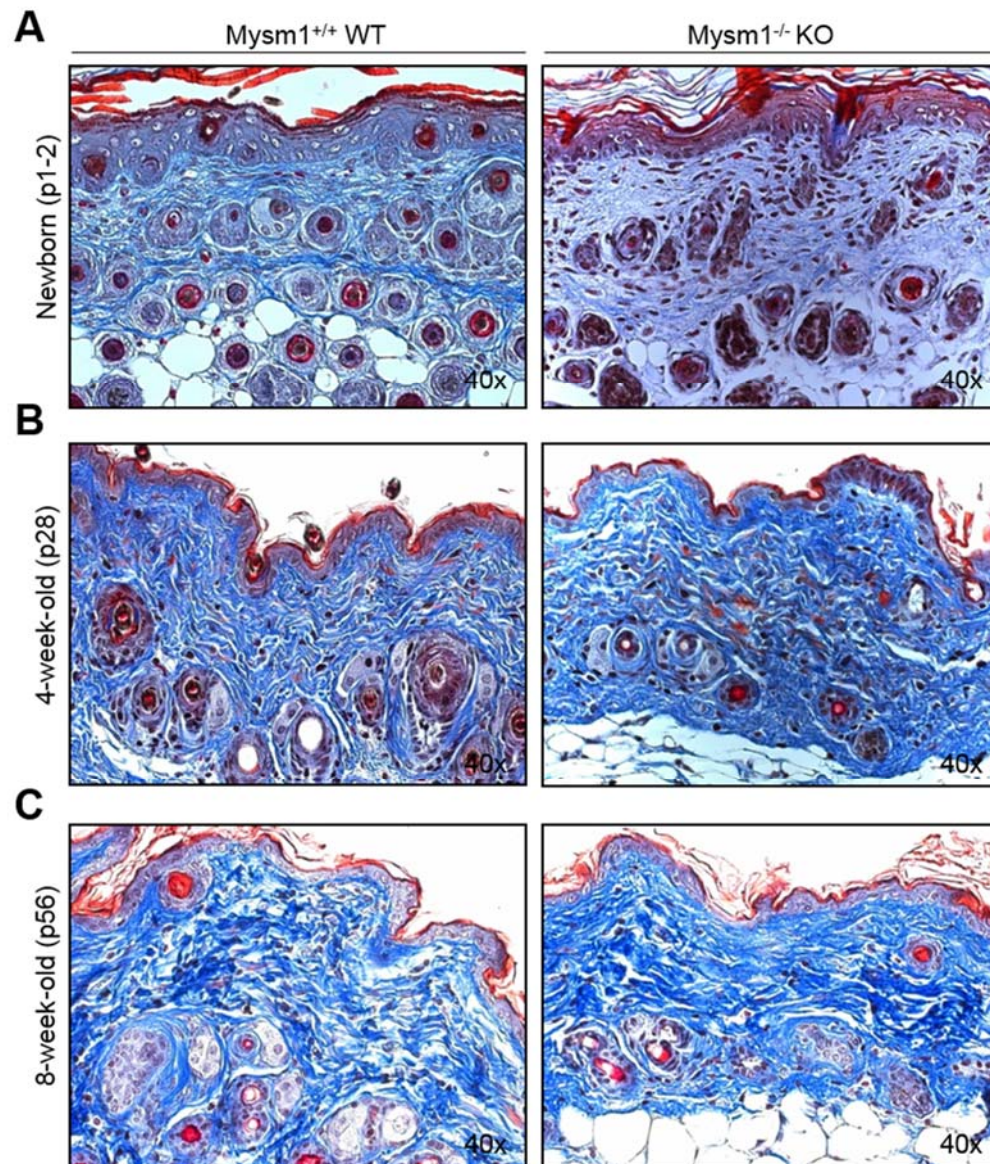

**Fig S1: Collagen deposition in Mysm1-deficient skin.** Masson Trichrome stainings of mouse skin sections of (A) newborn, (B) 4-week-old and (C) 8-week-old Mysm1<sup>-/-</sup> mice in comparison with wild-type littermates (n>3, representative images, original magnification 40X).

**Figure S2.**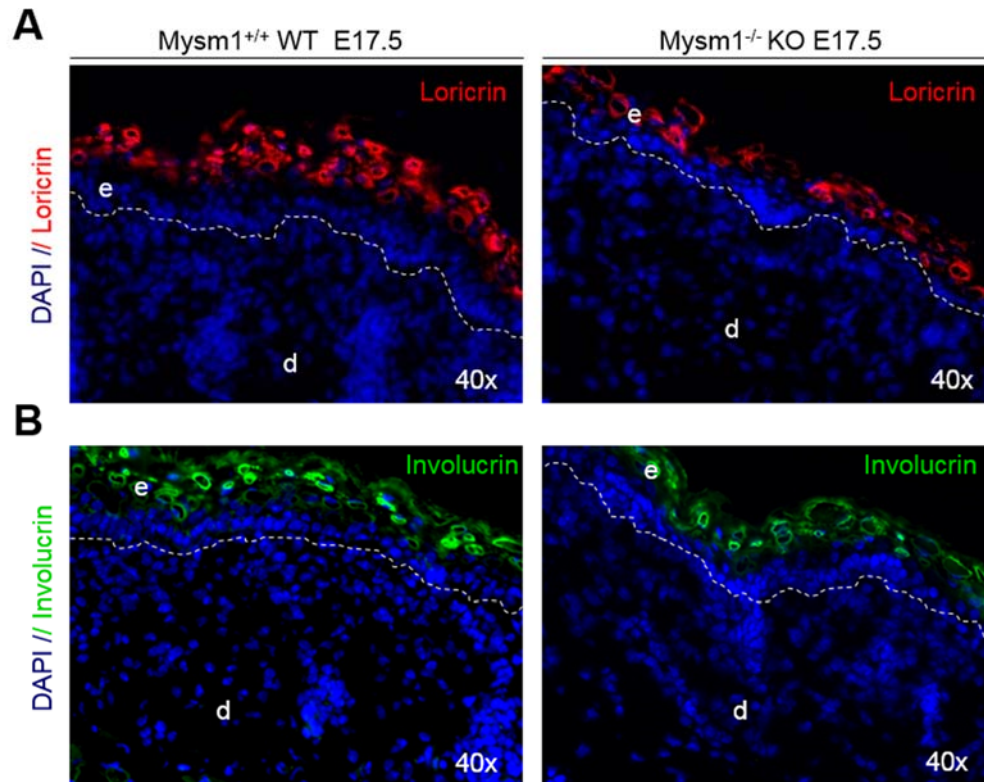

**Fig. S2: Expression of EDC proteins in *Mysm1*-deficient epidermis during development.** IF analysis of E17.5 skin of *Mysm1*-deficient in comparison with wild-type mice ( $n > 3$ , representative images shown, dotted white lines separate e: epidermis and d: dermis, original magnification 40X). (A) Loricrin expression (Loricrin red, DAPI-stained nuclei blue). (B) Involucrin expression (Involucrin green, DAPI-stained nuclei blue).
